# Supplementary material for: Molecular insights into the damping mechanism of poly(vinyl acetate)/hindered phenol hybrids by a combination of experiment and molecular dynamics simulation
Source: Royal Society of Chemistry journal article supplement (doi:10.1039/c4ra06644h), 2014-11-28
Supplement: c4ra06644h1.pdf [file c4ra06644h1.pdf]

## Supporting information

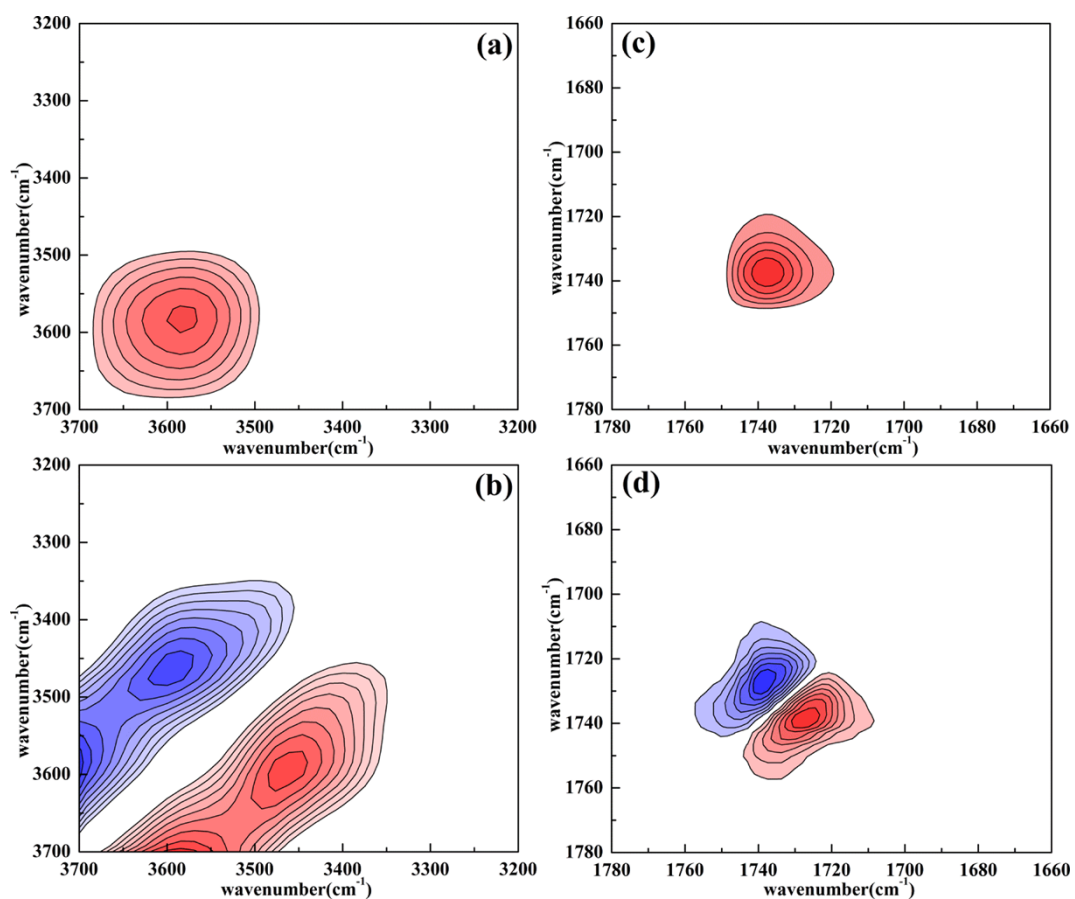

**Figure 1-S.** 2D IR correlation spectra of PVAO-6.25 phr obtained from 20 to 120 °C: (a) synchronous map of 3700-3200 cm<sup>-1</sup>, (b) asynchronous map of 3700-3200 cm<sup>-1</sup>, (c) synchronous map of 1780-1660 cm<sup>-1</sup> and (d) asynchronous map of 1780-1660 cm<sup>-1</sup>.

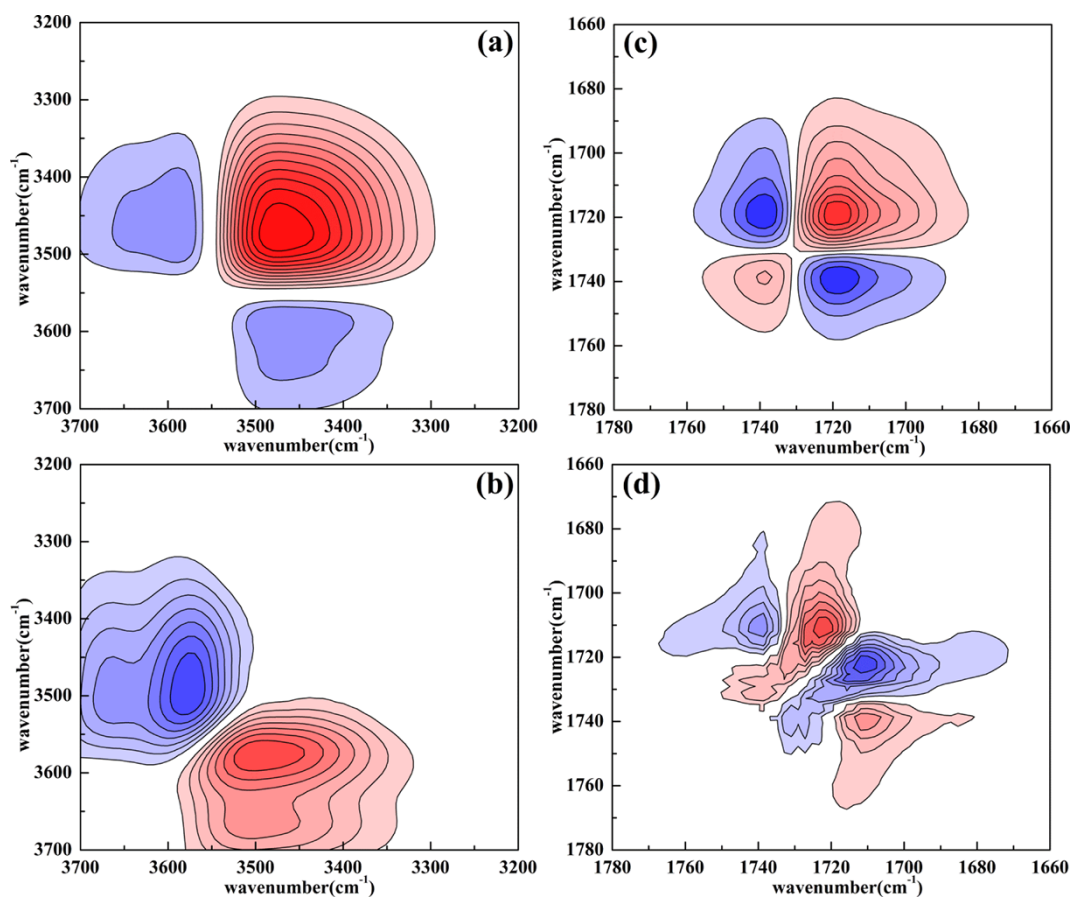

**Figure 2-S.** 2D IR correlation spectra of PVAO-50 phr obtained from 20 to 120 °C: (a) synchronous map of 3700-3200  $\text{cm}^{-1}$ , (b) asynchronous map of 3700-3200  $\text{cm}^{-1}$ , (c) synchronous map of 1780-1660  $\text{cm}^{-1}$  and (d) asynchronous map of 1780-1660  $\text{cm}^{-1}$ .

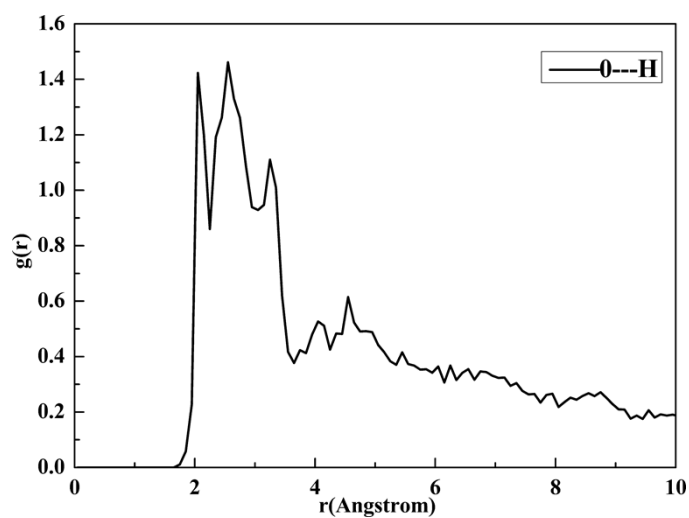

**Figure 3-S.** Pair correlation function for H (AO-70) and O (PVAc, AO-70) in

PVAO-25 phr.
